# Supplementary material for: Quantitative Ethylene Measurements with MOx Chemiresistive Sensors at Different Relative Air Humidities
Source: PubMed Central journal article supplement (PMC4701270; doi:10.3390/s151128088), 2015-11-06
Supplement: sensors-15-28088-s001.pdf [file sensors-15-28088-s001.pdf]

*Supplementary Information*

## **Quantitative Ethylene Measurements with MO<sub>x</sub> Chemiresistive Sensors at Different Relative Humidities. *Sensors* 2015, 15, 28088-28098**

**Matic Krivec**<sup>1,†,\*</sup>, **Gerald Mc Gunnigle**<sup>1,†</sup>, **Anže Abram**<sup>2</sup>, **Dieter Maier**<sup>3</sup>, **Roland Waldner**<sup>3</sup>, **Johanna M. Gostner**<sup>4</sup>, **Florian Überall**<sup>4</sup> and **Raimund Leitner**<sup>1,†</sup>

<sup>1</sup> CTR Carinthian Tech Research AG, Europastrasse 12, A-9524 Villach, Austria; E-Mails: gerald.mcgunnigle@ctr.at (G.M.G.); raimund.leitner@ctr.at (R.L.)

<sup>2</sup> Department for Nanostructured Materials, Jožef Stefan Institute, Jamova 39, SI-1000 Ljubljana, Slovenia; E-Mail: anze.abram@ijs.si

<sup>3</sup> Philips Consumer Lifestyle Klagenfurt, Koningsbergerstrasse 11, A-9020 Klagenfurt, Austria; E-Mails: dieter.maier@philips.com (D.M.); roland.waldner@philips.com (R.W.)

<sup>4</sup> Division of Medical Biochemistry, Medical University of Innsbruck, Center for Chemistry and Biomedicine, Innrain 80, A-6020 Innsbruck, Austria; E-Mails: johanna.gostner@i-med.ac.at (J.M.G.); florian.ueberall@i-med.ac.at (F.Ü.)

† These authors contributed equally to this work.

\* Author to whom correspondence should be addressed; E-Mail: matic.krivec@ctr.at; Tel.: +43-4242-56300-273; Fax: +43-4242-56300-400.

---

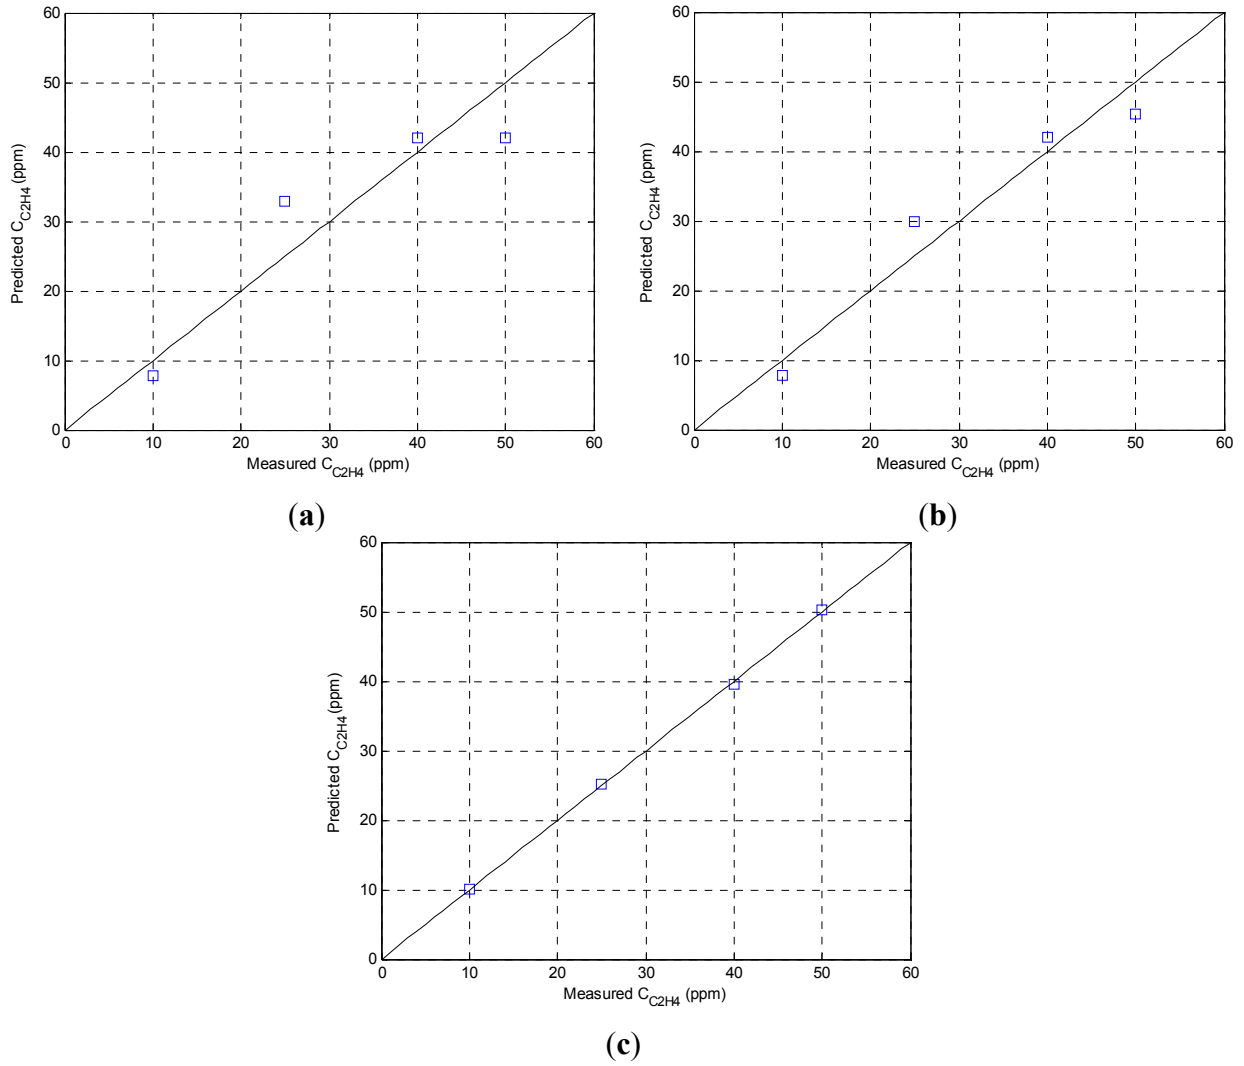

**Figure S1.** The correlation between the measured and predicted ethylene concentration at (a) 0%; (b) 33%; and (c) 64% relative humidity for MQ-3 sensor.

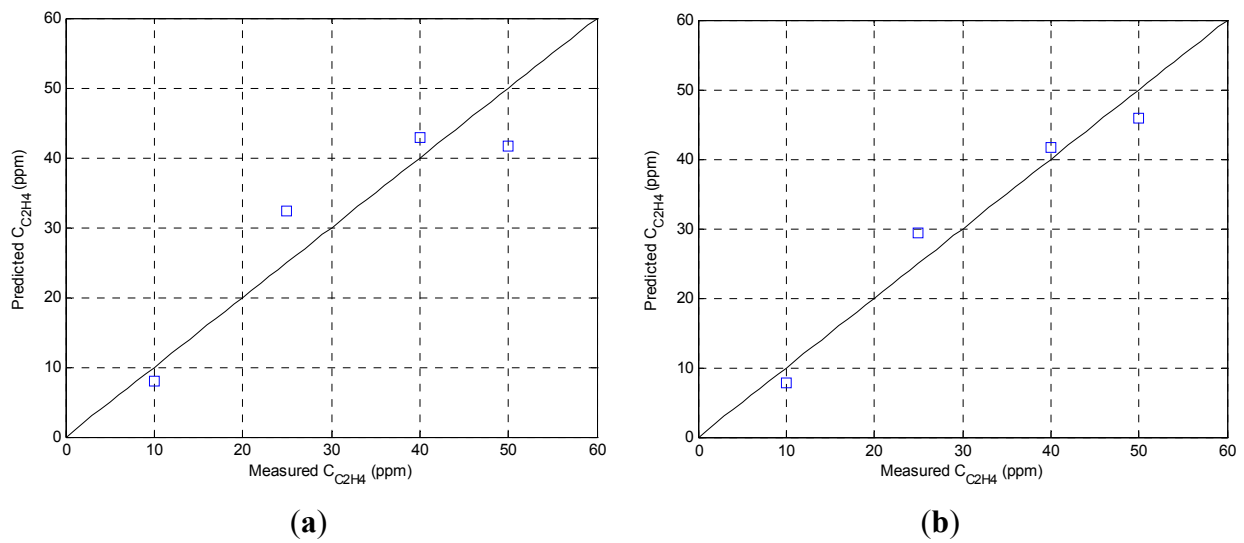

**Figure S2.** *Cont.*

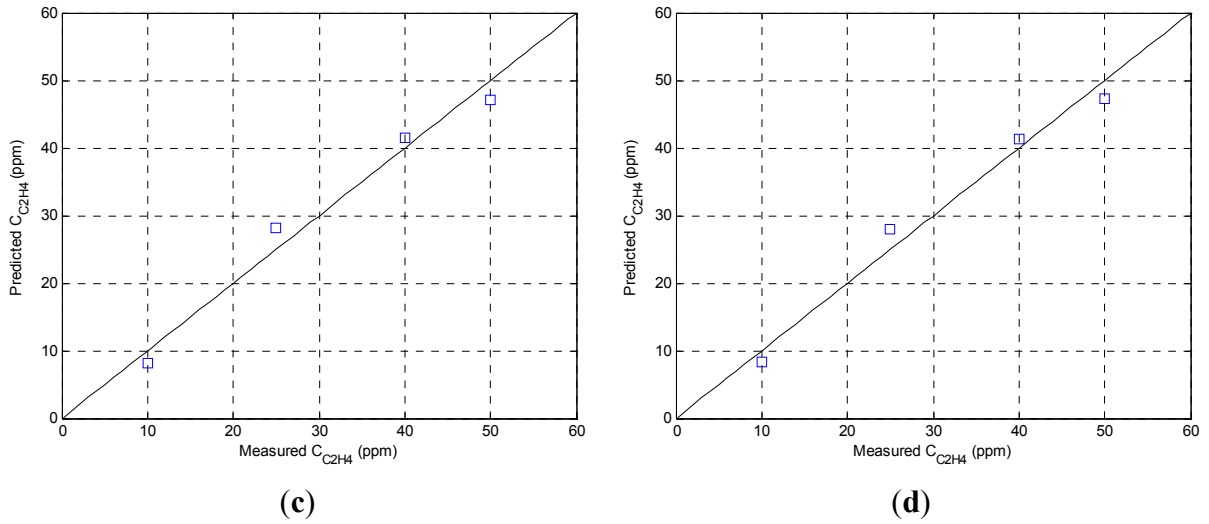

**Figure S2.** The correlation between the measured and predicted ethylene concentration at (a) 0%; (b) 33%; (c) 50%; and (d) 64% relative humidity for MiCS-5914 sensor.

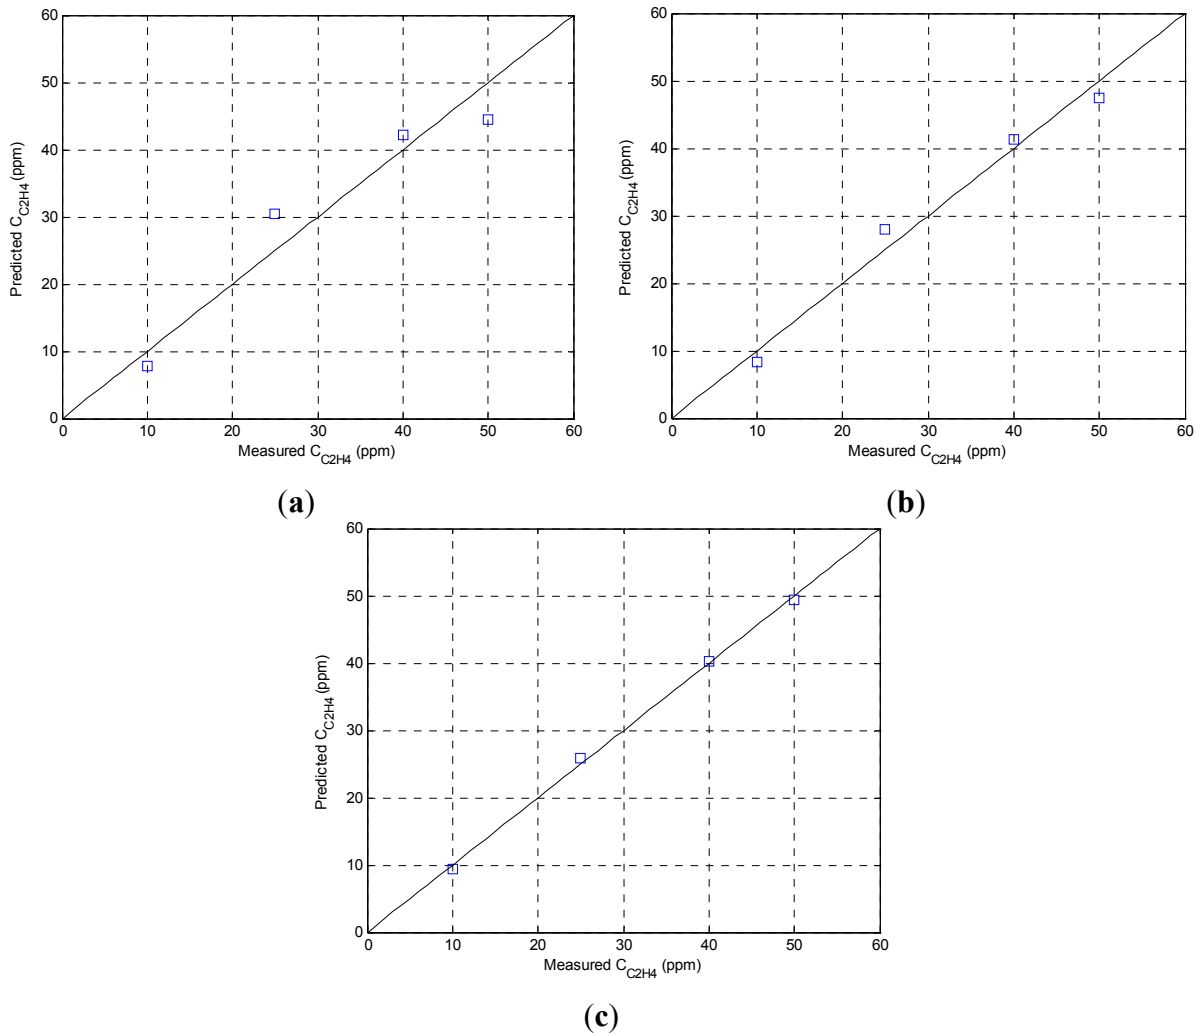

**Figure S3.** The correlation between the measured and predicted ethylene concentration at (a) 0%; (b) 33%; (c) 50% and (d) 64 % relative humidity for MiCS-5914 sensor. Measurements were conducted using longer stabilisation time (4500 s).

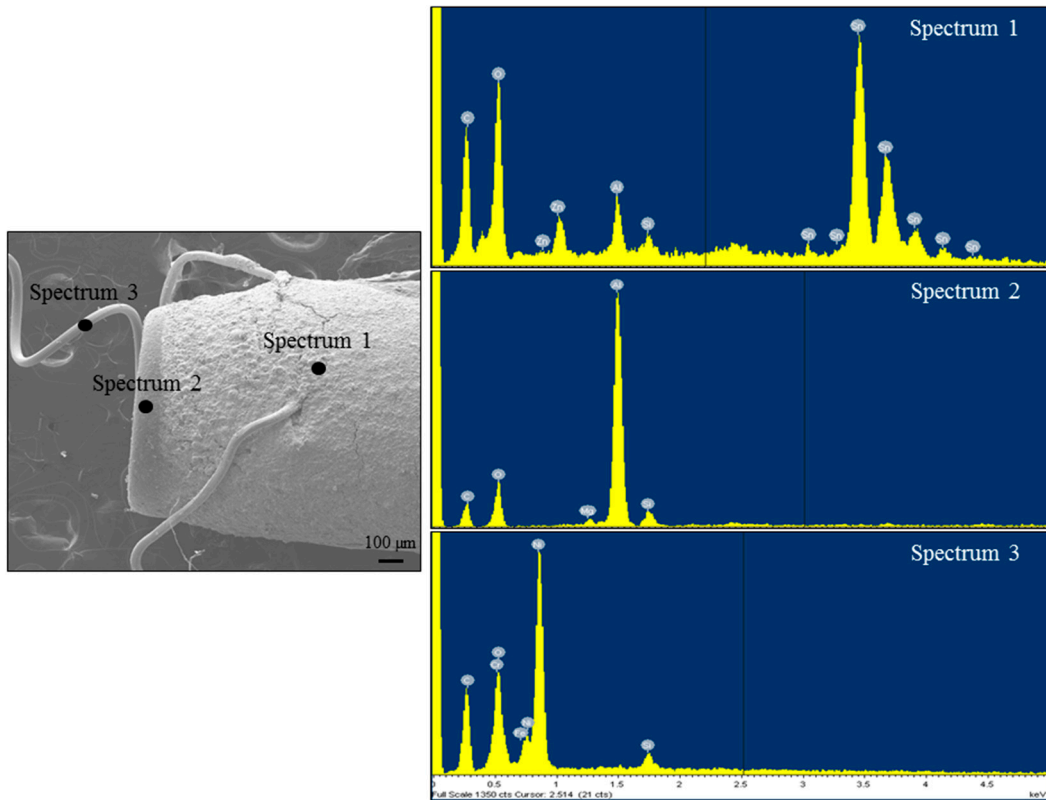

**Figure S4.** Scanning electron microscope (SEM) and energy dispersive spectroscopy (EDS) analysis of the main functional parts of the MQ-3 sensor.

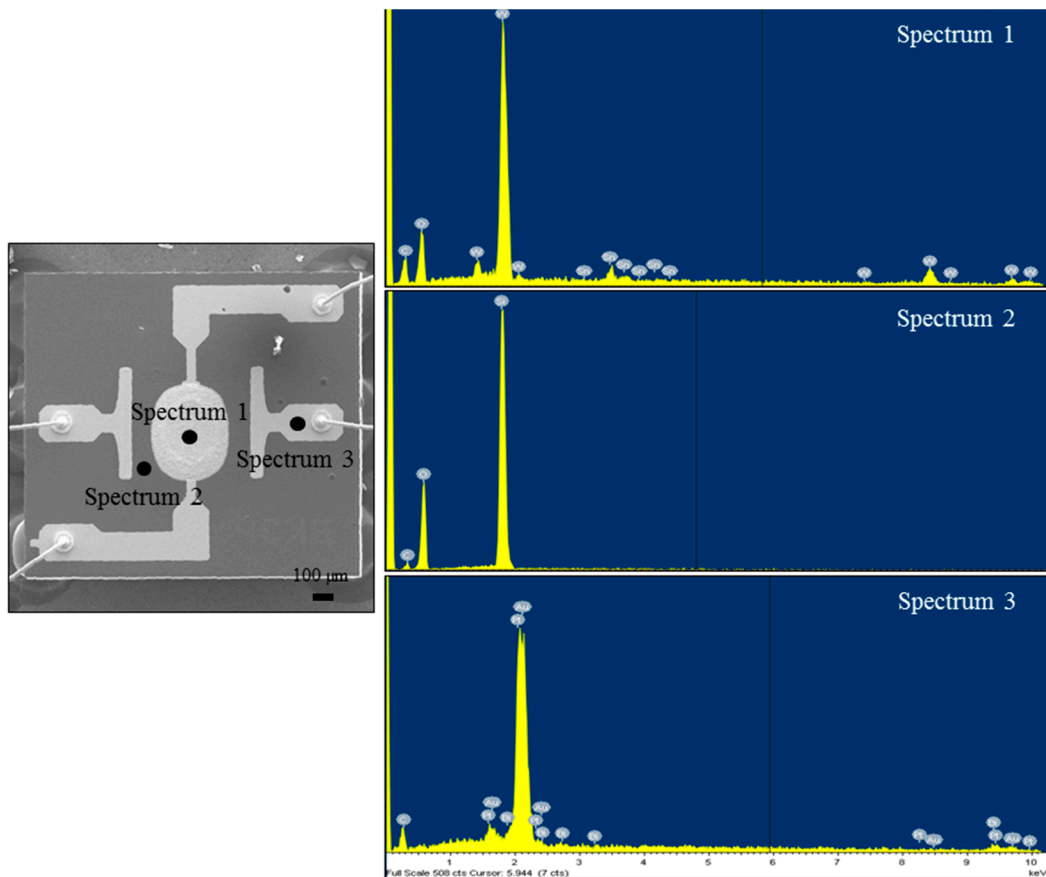

**Figure S5.** SEM and EDS analysis of the main functional parts of the MiCS-5914 sensor.
